# Supplementary material
Source: MDPI journal article supplement (https://www.mdpi.com/2076-3417/11/6/2503)
Supplement: s1 [file s1]

## MAM Report | Image name: P001

### morphology

|    | Feature Name            | Value    | Unit | Feature details                   |
|----|-------------------------|----------|------|-----------------------------------|
| 1  | area                    | 138.4403 | mm^2 | MORPH,--,MAM,--,LIN:--,S:--,RS:-- |
| 2  | perimeter               | 47.859   | mm   | MORPH,--,MAM,--,LIN:--,S:--,RS:-- |
| 3  | perimeter to area ratio | 0.3457   | --   | MORPH,--,MAM,--,LIN:--,S:--,RS:-- |
| 4  | compactness             | 0.75953  | --   | MORPH,--,MAM,--,LIN:--,S:--,RS:-- |
| 5  | circularity             | 0.87151  | --   | MORPH,--,MAM,--,LIN:--,S:--,RS:-- |
| 6  | acircularity            | 0.14743  | --   | MORPH,--,MAM,--,LIN:--,S:--,RS:-- |
| 7  | center of mass shift    | 0.57568  | mm   | MORPH,--,MAM,--,LIN:--,S:--,RS:-- |
| 8  | maximum diameter        | 15.9612  | mm   | MORPH,--,MAM,--,LIN:--,S:--,RS:-- |
| 9  | area density aabb       | 70.8454  | --   | MORPH,--,MAM,--,LIN:--,S:--,RS:-- |
| 10 | perimeter density aabb  | 0.84851  | --   | MORPH,--,MAM,--,LIN:--,S:--,RS:-- |

### intensity-based statistics

|    | Feature Name                   | Value    | Unit | Feature details                  |
|----|--------------------------------|----------|------|----------------------------------|
| 11 | mean                           | 455.254  | --   | STAT,--,MAM,--,LIN:2,S:1mm,RS:-- |
| 12 | variance                       | 2891.09  | --   | STAT,--,MAM,--,LIN:2,S:1mm,RS:-- |
| 13 | skewness                       | 0.69142  | --   | STAT,--,MAM,--,LIN:2,S:1mm,RS:-- |
| 14 | kurtosis                       | 1.8791   | --   | STAT,--,MAM,--,LIN:2,S:1mm,RS:-- |
| 15 | median                         | 452      | --   | STAT,--,MAM,--,LIN:2,S:1mm,RS:-- |
| 16 | minimum                        | 339      | --   | STAT,--,MAM,--,LIN:2,S:1mm,RS:-- |
| 17 | 10th percentile                | 385      | --   | STAT,--,MAM,--,LIN:2,S:1mm,RS:-- |
| 18 | 90th percentile                | 524      | --   | STAT,--,MAM,--,LIN:2,S:1mm,RS:-- |
| 19 | maximum                        | 698      | --   | STAT,--,MAM,--,LIN:2,S:1mm,RS:-- |
| 20 | Interquartile range            | 70       | --   | STAT,--,MAM,--,LIN:2,S:1mm,RS:-- |
| 21 | range                          | 359      | --   | STAT,--,MAM,--,LIN:2,S:1mm,RS:-- |
| 22 | Mean absolut deviation         | 41.4749  | --   | STAT,--,MAM,--,LIN:2,S:1mm,RS:-- |
| 23 | Robust mean absolute deviation | 28.467   | --   | STAT,--,MAM,--,LIN:2,S:1mm,RS:-- |
| 24 | Median absolute deviation      | 41.3551  | --   | STAT,--,MAM,--,LIN:2,S:1mm,RS:-- |
| 25 | Coefficient of variation       | 0.11811  | --   | STAT,--,MAM,--,LIN:2,S:1mm,RS:-- |
| 26 | Quartile coefficient           | 0.077263 | --   | STAT,--,MAM,--,LIN:2,S:1mm,RS:-- |
| 27 | Energy                         | 29000200 | --   | STAT,--,MAM,--,LIN:2,S:1mm,RS:-- |
| 28 | Root mean                      | 458.418  | --   | STAT,--,MAM,--,LIN:2,S:1mm,RS:-- |

### intensity histogram

|    | Feature Name                          | Value    | Unit | Feature details                    |
|----|---------------------------------------|----------|------|------------------------------------|
| 29 | mean                                  | 21.2246  | --   | IH,--,MAM,FBN:64,LIN:2,S:1mm,RS:-- |
| 30 | variance                              | 91.4061  | --   | IH,--,MAM,FBN:64,LIN:2,S:1mm,RS:-- |
| 31 | skewness                              | 0.68061  | --   | IH,--,MAM,FBN:64,LIN:2,S:1mm,RS:-- |
| 32 | kurtosis                              | 1.8183   | --   | IH,--,MAM,FBN:64,LIN:2,S:1mm,RS:-- |
| 33 | median                                | 21       | --   | IH,--,MAM,FBN:64,LIN:2,S:1mm,RS:-- |
| 34 | 10th percentile                       | 9        | --   | IH,--,MAM,FBN:64,LIN:2,S:1mm,RS:-- |
| 35 | 90th percentile                       | 33       | --   | IH,--,MAM,FBN:64,LIN:2,S:1mm,RS:-- |
| 36 | maximum                               | 64       | --   | IH,--,MAM,FBN:64,LIN:2,S:1mm,RS:-- |
| 37 | mode                                  | 12       | --   | IH,--,MAM,FBN:64,LIN:2,S:1mm,RS:-- |
| 38 | range                                 | 63       | --   | IH,--,MAM,FBN:64,LIN:2,S:1mm,RS:-- |
| 39 | mean absolut deviation                | 7.3713   | --   | IH,--,MAM,FBN:64,LIN:2,S:1mm,RS:-- |
| 40 | robust mean absolute deviation        | 5.2318   | --   | IH,--,MAM,FBN:64,LIN:2,S:1mm,RS:-- |
| 41 | median absolut deviation              | 7.3551   | --   | IH,--,MAM,FBN:64,LIN:2,S:1mm,RS:-- |
| 42 | coefficient of variation              | 0.45045  | --   | IH,--,MAM,FBN:64,LIN:2,S:1mm,RS:-- |
| 43 | entropy                               | 4.9959   | --   | IH,--,MAM,FBN:64,LIN:2,S:1mm,RS:-- |
| 44 | uniformity                            | 0.036232 | --   | IH,--,MAM,FBN:64,LIN:2,S:1mm,RS:-- |
| 45 | energy                                | 74781    | --   | IH,--,MAM,FBN:64,LIN:2,S:1mm,RS:-- |
| 46 | maximum histogram gradient            | 2.5      | --   | IH,--,MAM,FBN:64,LIN:2,S:1mm,RS:-- |
| 47 | maximum histogram gradient grey level | 22       | --   | IH,--,MAM,FBN:64,LIN:2,S:1mm,RS:-- |
| 48 | minimum histogram gradient            | -4       | --   | IH,--,MAM,FBN:64,LIN:2,S:1mm,RS:-- |
| 49 | minimum histogram gradient grey level | 24       | --   | IH,--,MAM,FBN:64,LIN:2,S:1mm,RS:-- |

*grey-level co-occurrence matrix*

|     | Feature Name                              | Value     | Unit | Feature details                           |
|-----|-------------------------------------------|-----------|------|-------------------------------------------|
| 50  | joint maximum                             | 0.013398  | --   | CM,2D:avg,MAM,FBN:64,LIN:2,S:1mm,RS:--    |
| 51  | joint average                             | 21.7501   | --   | CM,2D:avg,MAM,FBN:64,LIN:2,S:1mm,RS:--    |
| 52  | joint variance                            | 88.7545   | --   | CM,2D:avg,MAM,FBN:64,LIN:2,S:1mm,RS:--    |
| 53  | joint entropy                             | 7.5908    | --   | CM,2D:avg,MAM,FBN:64,LIN:2,S:1mm,RS:--    |
| 54  | difference average                        | 8.6175    | --   | CM,2D:avg,MAM,FBN:64,LIN:2,S:1mm,RS:--    |
| 55  | difference variance                       | 52.8427   | --   | CM,2D:avg,MAM,FBN:64,LIN:2,S:1mm,RS:--    |
| 56  | difference entropy                        | 4.3208    | --   | CM,2D:avg,MAM,FBN:64,LIN:2,S:1mm,RS:--    |
| 57  | sum average                               | 43.5003   | --   | CM,2D:avg,MAM,FBN:64,LIN:2,S:1mm,RS:--    |
| 58  | sum variance                              | 226.194   | --   | CM,2D:avg,MAM,FBN:64,LIN:2,S:1mm,RS:--    |
| 59  | sum entropy                               | 5.4116    | --   | CM,2D:avg,MAM,FBN:64,LIN:2,S:1mm,RS:--    |
| 60  | angular second moment                     | 0.0056005 | --   | CM,2D:avg,MAM,FBN:64,LIN:2,S:1mm,RS:--    |
| 61  | contrast                                  | 128.824   | --   | CM,2D:avg,MAM,FBN:64,LIN:2,S:1mm,RS:--    |
| 62  | dissimilarity                             | 8.6175    | --   | CM,2D:avg,MAM,FBN:64,LIN:2,S:1mm,RS:--    |
| 63  | inverse difference                        | 0.2063    | --   | CM,2D:avg,MAM,FBN:64,LIN:2,S:1mm,RS:--    |
| 64  | inverse difference normalised             | 0.8894    | --   | CM,2D:avg,MAM,FBN:64,LIN:2,S:1mm,RS:--    |
| 65  | inverse difference moment                 | 0.12108   | --   | CM,2D:avg,MAM,FBN:64,LIN:2,S:1mm,RS:--    |
| 66  | inverse difference moment normalised      | 0.97204   | --   | CM,2D:avg,MAM,FBN:64,LIN:2,S:1mm,RS:--    |
| 67  | inverse variance                          | 0.11151   | --   | CM,2D:avg,MAM,FBN:64,LIN:2,S:1mm,RS:--    |
| 68  | correlation                               | 0.27011   | --   | CM,2D:avg,MAM,FBN:64,LIN:2,S:1mm,RS:--    |
| 69  | autocorrelation                           | 497.509   | --   | CM,2D:avg,MAM,FBN:64,LIN:2,S:1mm,RS:--    |
| 70  | cluster tendency                          | 226.194   | --   | CM,2D:avg,MAM,FBN:64,LIN:2,S:1mm,RS:--    |
| 71  | cluster shade                             | 1141.34   | --   | CM,2D:avg,MAM,FBN:64,LIN:2,S:1mm,RS:--    |
| 72  | cluster prominence                        | 193758    | --   | CM,2D:avg,MAM,FBN:64,LIN:2,S:1mm,RS:--    |
| 73  | first measure of information correlation  | -0.4694   | --   | CM,2D:avg,MAM,FBN:64,LIN:2,S:1mm,RS:--    |
| 74  | second measure of information correlation | 0.99518   | --   | CM,2D:avg,MAM,FBN:64,LIN:2,S:1mm,RS:--    |
| 75  | joint maximum                             | 0.013398  | --   | CM,2.5D:dmrg,MAM,FBN:64,LIN:2,S:1mm,RS:-- |
| 76  | joint average                             | 21.7501   | --   | CM,2.5D:dmrg,MAM,FBN:64,LIN:2,S:1mm,RS:-- |
| 77  | joint variance                            | 88.7545   | --   | CM,2.5D:dmrg,MAM,FBN:64,LIN:2,S:1mm,RS:-- |
| 78  | joint entropy                             | 7.5908    | --   | CM,2.5D:dmrg,MAM,FBN:64,LIN:2,S:1mm,RS:-- |
| 79  | difference average                        | 8.6175    | --   | CM,2.5D:dmrg,MAM,FBN:64,LIN:2,S:1mm,RS:-- |
| 80  | difference variance                       | 52.8427   | --   | CM,2.5D:dmrg,MAM,FBN:64,LIN:2,S:1mm,RS:-- |
| 81  | difference entropy                        | 4.3208    | --   | CM,2.5D:dmrg,MAM,FBN:64,LIN:2,S:1mm,RS:-- |
| 82  | sum average                               | 43.5003   | --   | CM,2.5D:dmrg,MAM,FBN:64,LIN:2,S:1mm,RS:-- |
| 83  | sum variance                              | 226.194   | --   | CM,2.5D:dmrg,MAM,FBN:64,LIN:2,S:1mm,RS:-- |
| 84  | sum entropy                               | 5.4116    | --   | CM,2.5D:dmrg,MAM,FBN:64,LIN:2,S:1mm,RS:-- |
| 85  | angular second moment                     | 0.0056005 | --   | CM,2.5D:dmrg,MAM,FBN:64,LIN:2,S:1mm,RS:-- |
| 86  | contrast                                  | 128.824   | --   | CM,2.5D:dmrg,MAM,FBN:64,LIN:2,S:1mm,RS:-- |
| 87  | dissimilarity                             | 8.6175    | --   | CM,2.5D:dmrg,MAM,FBN:64,LIN:2,S:1mm,RS:-- |
| 88  | inverse difference                        | 0.2063    | --   | CM,2.5D:dmrg,MAM,FBN:64,LIN:2,S:1mm,RS:-- |
| 89  | inverse difference normalised             | 0.8894    | --   | CM,2.5D:dmrg,MAM,FBN:64,LIN:2,S:1mm,RS:-- |
| 90  | inverse difference moment                 | 0.12108   | --   | CM,2.5D:dmrg,MAM,FBN:64,LIN:2,S:1mm,RS:-- |
| 91  | inverse difference moment normalised      | 0.97204   | --   | CM,2.5D:dmrg,MAM,FBN:64,LIN:2,S:1mm,RS:-- |
| 92  | inverse variance                          | 0.11151   | --   | CM,2.5D:dmrg,MAM,FBN:64,LIN:2,S:1mm,RS:-- |
| 93  | correlation                               | 0.27011   | --   | CM,2.5D:dmrg,MAM,FBN:64,LIN:2,S:1mm,RS:-- |
| 94  | autocorrelation                           | 497.509   | --   | CM,2.5D:dmrg,MAM,FBN:64,LIN:2,S:1mm,RS:-- |
| 95  | cluster tendency                          | 226.194   | --   | CM,2.5D:dmrg,MAM,FBN:64,LIN:2,S:1mm,RS:-- |
| 96  | cluster shade                             | 1141.34   | --   | CM,2.5D:dmrg,MAM,FBN:64,LIN:2,S:1mm,RS:-- |
| 97  | cluster prominence                        | 193758    | --   | CM,2.5D:dmrg,MAM,FBN:64,LIN:2,S:1mm,RS:-- |
| 98  | first measure of information correlation  | -0.4694   | --   | CM,2.5D:dmrg,MAM,FBN:64,LIN:2,S:1mm,RS:-- |
| 99  | second measure of information correlation | 0.99518   | --   | CM,2.5D:dmrg,MAM,FBN:64,LIN:2,S:1mm,RS:-- |
| 100 | joint maximum                             | 0.0082645 | --   | CM,2D:mrg,MAM,FBN:64,LIN:2,S:1mm,RS:--    |
| 101 | joint average                             | 21.7428   | --   | CM,2D:mrg,MAM,FBN:64,LIN:2,S:1mm,RS:--    |
| 102 | joint variance                            | 88.8935   | --   | CM,2D:mrg,MAM,FBN:64,LIN:2,S:1mm,RS:--    |
| 103 | joint entropy                             | 8.9043    | --   | CM,2D:mrg,MAM,FBN:64,LIN:2,S:1mm,RS:--    |
| 104 | difference average                        | 8.5847    | --   | CM,2D:mrg,MAM,FBN:64,LIN:2,S:1mm,RS:--    |
| 105 | difference variance                       | 54.3585   | --   | CM,2D:mrg,MAM,FBN:64,LIN:2,S:1mm,RS:--    |
| 106 | difference entropy                        | 4.4842    | --   | CM,2D:mrg,MAM,FBN:64,LIN:2,S:1mm,RS:--    |
| 107 | sum average                               | 43.4855   | --   | CM,2D:mrg,MAM,FBN:64,LIN:2,S:1mm,RS:--    |
| 108 | sum variance                              | 227.518   | --   | CM,2D:mrg,MAM,FBN:64,LIN:2,S:1mm,RS:--    |
| 109 | sum entropy                               | 5.7844    | --   | CM,2D:mrg,MAM,FBN:64,LIN:2,S:1mm,RS:--    |
| 110 | angular second moment                     | 0.0025272 | --   | CM,2D:mrg,MAM,FBN:64,LIN:2,S:1mm,RS:--    |
| 111 | contrast                                  | 128.056   | --   | CM,2D:mrg,MAM,FBN:64,LIN:2,S:1mm,RS:--    |
| 112 | dissimilarity                             | 8.5847    | --   | CM,2D:mrg,MAM,FBN:64,LIN:2,S:1mm,RS:--    |
| 113 | inverse difference                        | 0.20706   | --   | CM,2D:mrg,MAM,FBN:64,LIN:2,S:1mm,RS:--    |
| 114 | inverse difference normalised             | 0.88978   | --   | CM,2D:mrg,MAM,FBN:64,LIN:2,S:1mm,RS:--    |

|     |                                           |           |    |                                           |
|-----|-------------------------------------------|-----------|----|-------------------------------------------|
| 115 | inverse difference moment                 | 0.12177   | -- | CM,2D:mrg,MAM,FBN:64,LIN:2,S:1mm,RS:--    |
| 116 | inverse difference moment normalised      | 0.9722    | -- | CM,2D:mrg,MAM,FBN:64,LIN:2,S:1mm,RS:--    |
| 117 | inverse variance                          | 0.1121    | -- | CM,2D:mrg,MAM,FBN:64,LIN:2,S:1mm,RS:--    |
| 118 | correlation                               | 0.27972   | -- | CM,2D:mrg,MAM,FBN:64,LIN:2,S:1mm,RS:--    |
| 119 | autocorrelation                           | 497.614   | -- | CM,2D:mrg,MAM,FBN:64,LIN:2,S:1mm,RS:--    |
| 120 | cluster tendency                          | 227.518   | -- | CM,2D:mrg,MAM,FBN:64,LIN:2,S:1mm,RS:--    |
| 121 | cluster shade                             | 1088.81   | -- | CM,2D:mrg,MAM,FBN:64,LIN:2,S:1mm,RS:--    |
| 122 | cluster prominence                        | 195718    | -- | CM,2D:mrg,MAM,FBN:64,LIN:2,S:1mm,RS:--    |
| 123 | first measure of information correlation  | -0.20657  | -- | CM,2D:mrg,MAM,FBN:64,LIN:2,S:1mm,RS:--    |
| 124 | second measure of information correlation | 0.9335    | -- | CM,2D:mrg,MAM,FBN:64,LIN:2,S:1mm,RS:--    |
| 125 | joint maximum                             | 0.0082645 | -- | CM,2.5D:vmrg,MAM,FBN:64,LIN:2,S:1mm,RS:-- |
| 126 | joint average                             | 21.7428   | -- | CM,2.5D:vmrg,MAM,FBN:64,LIN:2,S:1mm,RS:-- |
| 127 | joint variance                            | 88.8935   | -- | CM,2.5D:vmrg,MAM,FBN:64,LIN:2,S:1mm,RS:-- |
| 128 | joint entropy                             | 8.9043    | -- | CM,2.5D:vmrg,MAM,FBN:64,LIN:2,S:1mm,RS:-- |
| 129 | difference average                        | 8.5847    | -- | CM,2.5D:vmrg,MAM,FBN:64,LIN:2,S:1mm,RS:-- |
| 130 | difference variance                       | 54.3585   | -- | CM,2.5D:vmrg,MAM,FBN:64,LIN:2,S:1mm,RS:-- |
| 131 | difference entropy                        | 4.4842    | -- | CM,2.5D:vmrg,MAM,FBN:64,LIN:2,S:1mm,RS:-- |
| 132 | sum average                               | 43.4855   | -- | CM,2.5D:vmrg,MAM,FBN:64,LIN:2,S:1mm,RS:-- |
| 133 | sum variance                              | 227.518   | -- | CM,2.5D:vmrg,MAM,FBN:64,LIN:2,S:1mm,RS:-- |
| 134 | sum entropy                               | 5.7844    | -- | CM,2.5D:vmrg,MAM,FBN:64,LIN:2,S:1mm,RS:-- |
| 135 | angular second moment                     | 0.0025272 | -- | CM,2.5D:vmrg,MAM,FBN:64,LIN:2,S:1mm,RS:-- |
| 136 | contrast                                  | 128.056   | -- | CM,2.5D:vmrg,MAM,FBN:64,LIN:2,S:1mm,RS:-- |
| 137 | dissimilarity                             | 8.5847    | -- | CM,2.5D:vmrg,MAM,FBN:64,LIN:2,S:1mm,RS:-- |
| 138 | inverse difference                        | 0.20706   | -- | CM,2.5D:vmrg,MAM,FBN:64,LIN:2,S:1mm,RS:-- |
| 139 | inverse difference normalised             | 0.88978   | -- | CM,2.5D:vmrg,MAM,FBN:64,LIN:2,S:1mm,RS:-- |
| 140 | inverse difference moment                 | 0.12177   | -- | CM,2.5D:vmrg,MAM,FBN:64,LIN:2,S:1mm,RS:-- |
| 141 | inverse difference moment normalised      | 0.9722    | -- | CM,2.5D:vmrg,MAM,FBN:64,LIN:2,S:1mm,RS:-- |
| 142 | inverse variance                          | 0.1121    | -- | CM,2.5D:vmrg,MAM,FBN:64,LIN:2,S:1mm,RS:-- |
| 143 | correlation                               | 0.27972   | -- | CM,2.5D:vmrg,MAM,FBN:64,LIN:2,S:1mm,RS:-- |
| 144 | autocorrelation                           | 497.614   | -- | CM,2.5D:vmrg,MAM,FBN:64,LIN:2,S:1mm,RS:-- |
| 145 | cluster tendency                          | 227.518   | -- | CM,2.5D:vmrg,MAM,FBN:64,LIN:2,S:1mm,RS:-- |
| 146 | cluster shade                             | 1088.81   | -- | CM,2.5D:vmrg,MAM,FBN:64,LIN:2,S:1mm,RS:-- |
| 147 | cluster prominence                        | 195718    | -- | CM,2.5D:vmrg,MAM,FBN:64,LIN:2,S:1mm,RS:-- |
| 148 | first measure of information correlation  | -0.20657  | -- | CM,2.5D:vmrg,MAM,FBN:64,LIN:2,S:1mm,RS:-- |
| 149 | second measure of information correlation | 0.9335    | -- | CM,2.5D:vmrg,MAM,FBN:64,LIN:2,S:1mm,RS:-- |

#### grey-level run length matrix

|     | Feature Name                         | Value    | Unit | Feature details                           |
|-----|--------------------------------------|----------|------|-------------------------------------------|
| 150 | short run emphasis                   | 0.96693  | --   | RLM,2D:avg,MAM,FBN:64,LIN:2,S:1mm,RS:--   |
| 151 | long runs emphasis                   | 1.1409   | --   | RLM,2D:avg,MAM,FBN:64,LIN:2,S:1mm,RS:--   |
| 152 | Low grey level run emphasis          | 0.013469 | --   | RLM,2D:avg,MAM,FBN:64,LIN:2,S:1mm,RS:--   |
| 153 | High grey level run emphasis         | 548.88   | --   | RLM,2D:avg,MAM,FBN:64,LIN:2,S:1mm,RS:--   |
| 154 | Short run low grey level emphasis    | 0.013292 | --   | RLM,2D:avg,MAM,FBN:64,LIN:2,S:1mm,RS:--   |
| 155 | Short run high grey level emphasis   | 536.084  | --   | RLM,2D:avg,MAM,FBN:64,LIN:2,S:1mm,RS:--   |
| 156 | Long run low grey level emphasis     | 0.014199 | --   | RLM,2D:avg,MAM,FBN:64,LIN:2,S:1mm,RS:--   |
| 157 | Long run high grey level emphasis    | 603.862  | --   | RLM,2D:avg,MAM,FBN:64,LIN:2,S:1mm,RS:--   |
| 158 | Grey level non uniformity            | 4.7684   | --   | RLM,2D:avg,MAM,FBN:64,LIN:2,S:1mm,RS:--   |
| 159 | Grey level non uniformity normalized | 0.036127 | --   | RLM,2D:avg,MAM,FBN:64,LIN:2,S:1mm,RS:--   |
| 160 | Run length non uniformity            | 121.011  | --   | RLM,2D:avg,MAM,FBN:64,LIN:2,S:1mm,RS:--   |
| 161 | Run length non uniformity normalized | 0.91644  | --   | RLM,2D:avg,MAM,FBN:64,LIN:2,S:1mm,RS:--   |
| 162 | Run percentage                       | 0.95652  | --   | RLM,2D:avg,MAM,FBN:64,LIN:2,S:1mm,RS:--   |
| 163 | Grey level variance                  | 93.156   | --   | RLM,2D:avg,MAM,FBN:64,LIN:2,S:1mm,RS:--   |
| 164 | Run length variance                  | 0.047233 | --   | RLM,2D:avg,MAM,FBN:64,LIN:2,S:1mm,RS:--   |
| 165 | Run entropy                          | 5.1351   | --   | RLM,2D:avg,MAM,FBN:64,LIN:2,S:1mm,RS:--   |
| 166 | short run emphasis                   | 0.96693  | --   | RLM,2.5D:dmg,MAM,FBN:64,LIN:2,S:1mm,RS:-- |
| 167 | long runs emphasis                   | 1.1409   | --   | RLM,2.5D:dmg,MAM,FBN:64,LIN:2,S:1mm,RS:-- |
| 168 | Low grey level run emphasis          | 0.013469 | --   | RLM,2.5D:dmg,MAM,FBN:64,LIN:2,S:1mm,RS:-- |
| 169 | High grey level run emphasis         | 548.88   | --   | RLM,2.5D:dmg,MAM,FBN:64,LIN:2,S:1mm,RS:-- |
| 170 | Short run low grey level emphasis    | 0.013292 | --   | RLM,2.5D:dmg,MAM,FBN:64,LIN:2,S:1mm,RS:-- |
| 171 | Short run high grey level emphasis   | 536.084  | --   | RLM,2.5D:dmg,MAM,FBN:64,LIN:2,S:1mm,RS:-- |
| 172 | Long run low grey level emphasis     | 0.014199 | --   | RLM,2.5D:dmg,MAM,FBN:64,LIN:2,S:1mm,RS:-- |
| 173 | Long run high grey level emphasis    | 603.862  | --   | RLM,2.5D:dmg,MAM,FBN:64,LIN:2,S:1mm,RS:-- |
| 174 | Grey level non uniformity            | 4.7684   | --   | RLM,2.5D:dmg,MAM,FBN:64,LIN:2,S:1mm,RS:-- |
| 175 | Grey level non uniformity normalized | 0.036127 | --   | RLM,2.5D:dmg,MAM,FBN:64,LIN:2,S:1mm,RS:-- |
| 176 | Run length non uniformity            | 121.011  | --   | RLM,2.5D:dmg,MAM,FBN:64,LIN:2,S:1mm,RS:-- |
| 177 | Run length non uniformity normalized | 0.91644  | --   | RLM,2.5D:dmg,MAM,FBN:64,LIN:2,S:1mm,RS:-- |
| 178 | Run percentage                       | 0.95652  | --   | RLM,2.5D:dmg,MAM,FBN:64,LIN:2,S:1mm,RS:-- |
| 179 | Grey level variance                  | 93.156   | --   | RLM,2.5D:dmg,MAM,FBN:64,LIN:2,S:1mm,RS:-- |

|     |                                      |          |    |                                            |
|-----|--------------------------------------|----------|----|--------------------------------------------|
| 180 | Run length variance                  | 0.047233 | -- | RLM,2.5D:dmrg,MAM,FBN:64,LIN:2,S:1mm,RS:-- |
| 181 | Run entropy                          | 5.1351   | -- | RLM,2.5D:dmrg,MAM,FBN:64,LIN:2,S:1mm,RS:-- |
| 182 | short run emphasis                   | 0.96707  | -- | RLM,2.5D:mrg,MAM,FBN:64,LIN:2,S:1mm,RS:--  |
| 183 | long runs emphasis                   | 1.1401   | -- | RLM,2.5D:mrg,MAM,FBN:64,LIN:2,S:1mm,RS:--  |
| 184 | Low grey level run emphasis          | 0.013468 | -- | RLM,2.5D:mrg,MAM,FBN:64,LIN:2,S:1mm,RS:--  |
| 185 | High grey level run emphasis         | 548.828  | -- | RLM,2.5D:mrg,MAM,FBN:64,LIN:2,S:1mm,RS:--  |
| 186 | Short run low grey level emphasis    | 0.013291 | -- | RLM,2.5D:mrg,MAM,FBN:64,LIN:2,S:1mm,RS:--  |
| 187 | Short run high grey level emphasis   | 536.067  | -- | RLM,2.5D:mrg,MAM,FBN:64,LIN:2,S:1mm,RS:--  |
| 188 | Long run low grey level emphasis     | 0.014194 | -- | RLM,2.5D:mrg,MAM,FBN:64,LIN:2,S:1mm,RS:--  |
| 189 | Long run high grey level emphasis    | 603.583  | -- | RLM,2.5D:mrg,MAM,FBN:64,LIN:2,S:1mm,RS:--  |
| 190 | Grey level non uniformity            | 18.9848  | -- | RLM,2.5D:mrg,MAM,FBN:64,LIN:2,S:1mm,RS:--  |
| 191 | Grey level non uniformity normalized | 0.035956 | -- | RLM,2.5D:mrg,MAM,FBN:64,LIN:2,S:1mm,RS:--  |
| 192 | Run length non uniformity            | 483.92   | -- | RLM,2.5D:mrg,MAM,FBN:64,LIN:2,S:1mm,RS:--  |
| 193 | Run length non uniformity normalized | 0.91652  | -- | RLM,2.5D:mrg,MAM,FBN:64,LIN:2,S:1mm,RS:--  |
| 194 | Run percentage                       | 0.95652  | -- | RLM,2.5D:mrg,MAM,FBN:64,LIN:2,S:1mm,RS:--  |
| 195 | Grey level variance                  | 93.1507  | -- | RLM,2.5D:mrg,MAM,FBN:64,LIN:2,S:1mm,RS:--  |
| 196 | Run length variance                  | 0.047176 | -- | RLM,2.5D:mrg,MAM,FBN:64,LIN:2,S:1mm,RS:--  |
| 197 | Run entropy                          | 5.2032   | -- | RLM,2.5D:mrg,MAM,FBN:64,LIN:2,S:1mm,RS:--  |
| 198 | short run emphasis                   | 0.96707  | -- | RLM,2.5D:vmrg,MAM,FBN:64,LIN:2,S:1mm,RS:-- |
| 199 | long runs emphasis                   | 1.1401   | -- | RLM,2.5D:vmrg,MAM,FBN:64,LIN:2,S:1mm,RS:-- |
| 200 | Low grey level run emphasis          | 0.013468 | -- | RLM,2.5D:vmrg,MAM,FBN:64,LIN:2,S:1mm,RS:-- |
| 201 | High grey level run emphasis         | 548.828  | -- | RLM,2.5D:vmrg,MAM,FBN:64,LIN:2,S:1mm,RS:-- |
| 202 | Short run low grey level emphasis    | 0.013291 | -- | RLM,2.5D:vmrg,MAM,FBN:64,LIN:2,S:1mm,RS:-- |
| 203 | Short run high grey level emphasis   | 536.067  | -- | RLM,2.5D:vmrg,MAM,FBN:64,LIN:2,S:1mm,RS:-- |
| 204 | Long run low grey level emphasis     | 0.014194 | -- | RLM,2.5D:vmrg,MAM,FBN:64,LIN:2,S:1mm,RS:-- |
| 205 | Long run high grey level emphasis    | 603.583  | -- | RLM,2.5D:vmrg,MAM,FBN:64,LIN:2,S:1mm,RS:-- |
| 206 | Grey level non uniformity            | 18.9848  | -- | RLM,2.5D:vmrg,MAM,FBN:64,LIN:2,S:1mm,RS:-- |
| 207 | Grey level non uniformity normalized | 0.035956 | -- | RLM,2.5D:vmrg,MAM,FBN:64,LIN:2,S:1mm,RS:-- |
| 208 | Run length non uniformity            | 483.92   | -- | RLM,2.5D:vmrg,MAM,FBN:64,LIN:2,S:1mm,RS:-- |
| 209 | Run length non uniformity normalized | 0.91652  | -- | RLM,2.5D:vmrg,MAM,FBN:64,LIN:2,S:1mm,RS:-- |
| 210 | Run percentage                       | 0.95652  | -- | RLM,2.5D:vmrg,MAM,FBN:64,LIN:2,S:1mm,RS:-- |
| 211 | Grey level variance                  | 49183.6  | -- | RLM,2.5D:vmrg,MAM,FBN:64,LIN:2,S:1mm,RS:-- |
| 212 | Run length variance                  | 24.9091  | -- | RLM,2.5D:vmrg,MAM,FBN:64,LIN:2,S:1mm,RS:-- |
| 213 | Run entropy                          | -2028.14 | -- | RLM,2.5D:vmrg,MAM,FBN:64,LIN:2,S:1mm,RS:-- |

#### grey-level size zone matrix

|     | Feature Name                               | Value    | Unit | Feature details                       |
|-----|--------------------------------------------|----------|------|---------------------------------------|
| 214 | small zone emphasis                        | 0.89227  | --   | SZM,2D,MAM,FBN:64,LIN:2,S:1mm,RS:--   |
| 215 | large zone emphasis                        | 1.641    | --   | SZM,2D,MAM,FBN:64,LIN:2,S:1mm,RS:--   |
| 216 | low grey level zone emphasis               | 0.014511 | --   | SZM,2D,MAM,FBN:64,LIN:2,S:1mm,RS:--   |
| 217 | high grey level zone emphasis              | 567.786  | --   | SZM,2D,MAM,FBN:64,LIN:2,S:1mm,RS:--   |
| 218 | small zone low grey level emphasis         | 0.013894 | --   | SZM,2D,MAM,FBN:64,LIN:2,S:1mm,RS:--   |
| 219 | small zone high grey level emphasis        | 525.803  | --   | SZM,2D,MAM,FBN:64,LIN:2,S:1mm,RS:--   |
| 220 | large zone low grey level emphasis         | 0.017714 | --   | SZM,2D,MAM,FBN:64,LIN:2,S:1mm,RS:--   |
| 221 | large zone high grey level emphasis        | 829.513  | --   | SZM,2D,MAM,FBN:64,LIN:2,S:1mm,RS:--   |
| 222 | grey level non uniformity glszm            | 4.2308   | --   | SZM,2D,MAM,FBN:64,LIN:2,S:1mm,RS:--   |
| 223 | grey level non uniformity normalized glszm | 0.03616  | --   | SZM,2D,MAM,FBN:64,LIN:2,S:1mm,RS:--   |
| 224 | zone size non uniformity                   | 88.5043  | --   | SZM,2D,MAM,FBN:64,LIN:2,S:1mm,RS:--   |
| 225 | zone size non uniformity normalized        | 0.75645  | --   | SZM,2D,MAM,FBN:64,LIN:2,S:1mm,RS:--   |
| 226 | zone percentage glszm                      | 0.84783  | --   | SZM,2D,MAM,FBN:64,LIN:2,S:1mm,RS:--   |
| 227 | grey level variance glszm                  | 98.3419  | --   | SZM,2D,MAM,FBN:64,LIN:2,S:1mm,RS:--   |
| 228 | zone size variance                         | 0.24984  | --   | SZM,2D,MAM,FBN:64,LIN:2,S:1mm,RS:--   |
| 229 | zone size entropy                          | 5.3331   | --   | SZM,2D,MAM,FBN:64,LIN:2,S:1mm,RS:--   |
| 230 | small zone emphasis                        | 0.89227  | --   | SZM,2.5D,MAM,FBN:64,LIN:2,S:1mm,RS:-- |
| 231 | large zone emphasis                        | 1.641    | --   | SZM,2.5D,MAM,FBN:64,LIN:2,S:1mm,RS:-- |
| 232 | low grey level zone emphasis               | 0.014511 | --   | SZM,2.5D,MAM,FBN:64,LIN:2,S:1mm,RS:-- |
| 233 | high grey level zone emphasis              | 567.786  | --   | SZM,2.5D,MAM,FBN:64,LIN:2,S:1mm,RS:-- |
| 234 | small zone low grey level emphasis         | 0.013894 | --   | SZM,2.5D,MAM,FBN:64,LIN:2,S:1mm,RS:-- |
| 235 | small zone high grey level emphasis        | 525.803  | --   | SZM,2.5D,MAM,FBN:64,LIN:2,S:1mm,RS:-- |
| 236 | large zone low grey level emphasis         | 0.017714 | --   | SZM,2.5D,MAM,FBN:64,LIN:2,S:1mm,RS:-- |
| 237 | large zone high grey level emphasis        | 829.513  | --   | SZM,2.5D,MAM,FBN:64,LIN:2,S:1mm,RS:-- |
| 238 | grey level non uniformity glszm            | 4.2308   | --   | SZM,2.5D,MAM,FBN:64,LIN:2,S:1mm,RS:-- |
| 239 | grey level non uniformity normalized glszm | 0.03616  | --   | SZM,2.5D,MAM,FBN:64,LIN:2,S:1mm,RS:-- |
| 240 | zone size non uniformity                   | 88.5043  | --   | SZM,2.5D,MAM,FBN:64,LIN:2,S:1mm,RS:-- |
| 241 | zone size non uniformity normalized        | 0.75645  | --   | SZM,2.5D,MAM,FBN:64,LIN:2,S:1mm,RS:-- |
| 242 | zone percentage glszm                      | 0.84783  | --   | SZM,2.5D,MAM,FBN:64,LIN:2,S:1mm,RS:-- |
| 243 | grey level variance glszm                  | 98.3419  | --   | SZM,2.5D,MAM,FBN:64,LIN:2,S:1mm,RS:-- |
| 244 | zone size variance                         | 0.24984  | --   | SZM,2.5D,MAM,FBN:64,LIN:2,S:1mm,RS:-- |
| 245 | zone size entropy                          | 5.3331   | --   | SZM,2.5D,MAM,FBN:64,LIN:2,S:1mm,RS:-- |

### neighbourhood grey tone difference matrix

|     | Feature Name | Value    | Unit | Feature details                       |
|-----|--------------|----------|------|---------------------------------------|
| 246 | coarseness   | 0.042055 | --   | TDM,2D,MAM,FBN:64,LIN:2,S:1mm,RS:--   |
| 247 | contrast     | 0.71356  | --   | TDM,2D,MAM,FBN:64,LIN:2,S:1mm,RS:--   |
| 248 | busyness     | 0.034918 | --   | TDM,2D,MAM,FBN:64,LIN:2,S:1mm,RS:--   |
| 249 | complexity   | 3629.22  | --   | TDM,2D,MAM,FBN:64,LIN:2,S:1mm,RS:--   |
| 250 | strength     | 26.238   | --   | TDM,2D,MAM,FBN:64,LIN:2,S:1mm,RS:--   |
| 251 | coarseness   | 0.042055 | --   | TDM,2.5D,MAM,FBN:64,LIN:2,S:1mm,RS:-- |
| 252 | contrast     | 0.71356  | --   | TDM,2.5D,MAM,FBN:64,LIN:2,S:1mm,RS:-- |
| 253 | busyness     | 0.034918 | --   | TDM,2.5D,MAM,FBN:64,LIN:2,S:1mm,RS:-- |
| 254 | complexity   | 3629.22  | --   | TDM,2.5D,MAM,FBN:64,LIN:2,S:1mm,RS:-- |
| 255 | strength     | 26.238   | --   | TDM,2.5D,MAM,FBN:64,LIN:2,S:1mm,RS:-- |

### grey-level distance zone matrix

|     | Feature Name                                  | Value    | Unit | Feature details                       |
|-----|-----------------------------------------------|----------|------|---------------------------------------|
| 256 | small distance emphasis gldzm                 | 0.41418  | --   | DZM,2D,MAM,FBN:64,LIN:2,S:1mm,RS:--   |
| 257 | large distance emphasis gldzm                 | 7.9316   | --   | DZM,2D,MAM,FBN:64,LIN:2,S:1mm,RS:--   |
| 258 | low grey level zone emphasis gldzm            | 0.014511 | --   | DZM,2D,MAM,FBN:64,LIN:2,S:1mm,RS:--   |
| 259 | high grey level zone emphasis gldzm           | 567.786  | --   | DZM,2D,MAM,FBN:64,LIN:2,S:1mm,RS:--   |
| 260 | small distance high grey level emphasis gldzm | 181.597  | --   | DZM,2D,MAM,FBN:64,LIN:2,S:1mm,RS:--   |
| 261 | large distance low grey level emphasis gldzm  | 0.032336 | --   | DZM,2D,MAM,FBN:64,LIN:2,S:1mm,RS:--   |
| 262 | large distance high grey level emphasis gldzm | 5387.58  | --   | DZM,2D,MAM,FBN:64,LIN:2,S:1mm,RS:--   |
| 263 | grey level non uniformity gldzm               | 4.2308   | --   | DZM,2D,MAM,FBN:64,LIN:2,S:1mm,RS:--   |
| 264 | grey level non uniformity normalized gldzm    | 0.03616  | --   | DZM,2D,MAM,FBN:64,LIN:2,S:1mm,RS:--   |
| 265 | zone distance non uniformity gldzm            | 26.7265  | --   | DZM,2D,MAM,FBN:64,LIN:2,S:1mm,RS:--   |
| 266 | zone distance non uniformity normalized gldzm | 0.22843  | --   | DZM,2D,MAM,FBN:64,LIN:2,S:1mm,RS:--   |
| 267 | zone percentage gldzm                         | 0.84783  | --   | DZM,2D,MAM,FBN:64,LIN:2,S:1mm,RS:--   |
| 268 | grey level variance gldzm                     | 98.3419  | --   | DZM,2D,MAM,FBN:64,LIN:2,S:1mm,RS:--   |
| 269 | zone distance variance gldzm                  | 1.8724   | --   | DZM,2D,MAM,FBN:64,LIN:2,S:1mm,RS:--   |
| 270 | zone distance entropy gldzm                   | 6.383    | --   | DZM,2D,MAM,FBN:64,LIN:2,S:1mm,RS:--   |
| 271 | small distance emphasis gldzm                 | 0.41418  | --   | DZM,2.5D,MAM,FBN:64,LIN:2,S:1mm,RS:-- |
| 272 | large distance emphasis gldzm                 | 7.9316   | --   | DZM,2.5D,MAM,FBN:64,LIN:2,S:1mm,RS:-- |
| 273 | low grey level zone emphasis gldzm            | 0.014511 | --   | DZM,2.5D,MAM,FBN:64,LIN:2,S:1mm,RS:-- |
| 274 | high grey level zone emphasis gldzm           | 567.786  | --   | DZM,2.5D,MAM,FBN:64,LIN:2,S:1mm,RS:-- |
| 275 | small distance high grey level emphasis gldzm | 181.597  | --   | DZM,2.5D,MAM,FBN:64,LIN:2,S:1mm,RS:-- |
| 276 | large distance low grey level emphasis gldzm  | 0.032336 | --   | DZM,2.5D,MAM,FBN:64,LIN:2,S:1mm,RS:-- |
| 277 | large distance high grey level emphasis gldzm | 5387.58  | --   | DZM,2.5D,MAM,FBN:64,LIN:2,S:1mm,RS:-- |
| 278 | grey level non uniformity gldzm               | 4.2308   | --   | DZM,2.5D,MAM,FBN:64,LIN:2,S:1mm,RS:-- |
| 279 | grey level non uniformity normalized gldzm    | 0.03616  | --   | DZM,2.5D,MAM,FBN:64,LIN:2,S:1mm,RS:-- |
| 280 | zone distance non uniformity gldzm            | 26.7265  | --   | DZM,2.5D,MAM,FBN:64,LIN:2,S:1mm,RS:-- |
| 281 | zone distance non uniformity normalized gldzm | 0.22843  | --   | DZM,2.5D,MAM,FBN:64,LIN:2,S:1mm,RS:-- |
| 282 | zone percentage gldzm                         | 0.21196  | --   | DZM,2.5D,MAM,FBN:64,LIN:2,S:1mm,RS:-- |
| 283 | grey level variance gldzm                     | 98.3419  | --   | DZM,2.5D,MAM,FBN:64,LIN:2,S:1mm,RS:-- |
| 284 | zone distance variance gldzm                  | 1.8724   | --   | DZM,2.5D,MAM,FBN:64,LIN:2,S:1mm,RS:-- |
| 285 | zone distance entropy gldzm                   | 6.383    | --   | DZM,2.5D,MAM,FBN:64,LIN:2,S:1mm,RS:-- |

### neighbouring grey level dependence matrix

|     | Feature Name                               | Value    | Unit | Feature details                     |
|-----|--------------------------------------------|----------|------|-------------------------------------|
| 286 | low dependence emphasis                    | 0.7885   | --   | LDM,2D,MAM,FBN:64,LIN:2,S:1mm,RS:-- |
| 287 | high dependence emphasis                   | 2.2174   | --   | LDM,2D,MAM,FBN:64,LIN:2,S:1mm,RS:-- |
| 288 | low grey level count emphasis              | 0.013111 | --   | LDM,2D,MAM,FBN:64,LIN:2,S:1mm,RS:-- |
| 289 | high grey level count emphasis             | 541.891  | --   | LDM,2D,MAM,FBN:64,LIN:2,S:1mm,RS:-- |
| 290 | low dependence low grey level emphasis     | 0.011952 | --   | LDM,2D,MAM,FBN:64,LIN:2,S:1mm,RS:-- |
| 291 | low dependence high grey level emphasis    | 458.918  | --   | LDM,2D,MAM,FBN:64,LIN:2,S:1mm,RS:-- |
| 292 | high dependence low grey level emphasis    | 0.019327 | --   | LDM,2D,MAM,FBN:64,LIN:2,S:1mm,RS:-- |
| 293 | high dependence high grey level emphasis   | 1017.27  | --   | LDM,2D,MAM,FBN:64,LIN:2,S:1mm,RS:-- |
| 294 | grey level non uniformity                  | 5        | --   | LDM,2D,MAM,FBN:64,LIN:2,S:1mm,RS:-- |
| 295 | grey level non uniformity normalized       | 0.036232 | --   | LDM,2D,MAM,FBN:64,LIN:2,S:1mm,RS:-- |
| 296 | dependence count non uniformity            | 79.7971  | --   | LDM,2D,MAM,FBN:64,LIN:2,S:1mm,RS:-- |
| 297 | dependence count non uniformity normalized | 0.57824  | --   | LDM,2D,MAM,FBN:64,LIN:2,S:1mm,RS:-- |
| 298 | dependence count percentage                | 1        | --   | LDM,2D,MAM,FBN:64,LIN:2,S:1mm,RS:-- |
| 299 | grey level variance                        | 91.4061  | --   | LDM,2D,MAM,FBN:64,LIN:2,S:1mm,RS:-- |

|     |                                            |          |    |                                       |
|-----|--------------------------------------------|----------|----|---------------------------------------|
| 300 | dependence count variance                  | 0.40076  | -- | LDM,2D,MAM,FBN:64,LIN:2,S:1mm,RS:--   |
| 301 | dependence count entropy                   | 5.4989   | -- | LDM,2D,MAM,FBN:64,LIN:2,S:1mm,RS:--   |
| 302 | dependence count energy                    | 0.02594  | -- | LDM,2D,MAM,FBN:64,LIN:2,S:1mm,RS:--   |
| 303 | low dependence emphasis                    | 0.7885   | -- | LDM,2.5D,MAM,FBN:64,LIN:2,S:1mm,RS:-- |
| 304 | high dependence emphasis                   | 2.2174   | -- | LDM,2.5D,MAM,FBN:64,LIN:2,S:1mm,RS:-- |
| 305 | low grey level count emphasis              | 0.013111 | -- | LDM,2.5D,MAM,FBN:64,LIN:2,S:1mm,RS:-- |
| 306 | high grey level count emphasis             | 541.891  | -- | LDM,2.5D,MAM,FBN:64,LIN:2,S:1mm,RS:-- |
| 307 | low dependence low grey level emphasis     | 0.011952 | -- | LDM,2.5D,MAM,FBN:64,LIN:2,S:1mm,RS:-- |
| 308 | low dependence high grey level emphasis    | 458.918  | -- | LDM,2.5D,MAM,FBN:64,LIN:2,S:1mm,RS:-- |
| 309 | high dependence low grey level emphasis    | 0.019327 | -- | LDM,2.5D,MAM,FBN:64,LIN:2,S:1mm,RS:-- |
| 310 | high dependence high grey level emphasis   | 1017.27  | -- | LDM,2.5D,MAM,FBN:64,LIN:2,S:1mm,RS:-- |
| 311 | grey level non uniformity                  | 5        | -- | LDM,2.5D,MAM,FBN:64,LIN:2,S:1mm,RS:-- |
| 312 | grey level non uniformity normalized       | 0.036232 | -- | LDM,2.5D,MAM,FBN:64,LIN:2,S:1mm,RS:-- |
| 313 | dependence count non uniformity            | 79.7971  | -- | LDM,2.5D,MAM,FBN:64,LIN:2,S:1mm,RS:-- |
| 314 | dependence count non uniformity normalized | 0.57824  | -- | LDM,2.5D,MAM,FBN:64,LIN:2,S:1mm,RS:-- |
| 315 | dependence count percentage                | 1        | -- | LDM,2.5D,MAM,FBN:64,LIN:2,S:1mm,RS:-- |
| 316 | grey level variance                        | 91.4061  | -- | LDM,2.5D,MAM,FBN:64,LIN:2,S:1mm,RS:-- |
| 317 | dependence count variance                  | 0.40076  | -- | LDM,2.5D,MAM,FBN:64,LIN:2,S:1mm,RS:-- |
| 318 | dependence count entropy                   | 5.4989   | -- | LDM,2.5D,MAM,FBN:64,LIN:2,S:1mm,RS:-- |
| 319 | dependence count energy                    | 0.02594  | -- | LDM,2.5D,MAM,FBN:64,LIN:2,S:1mm,RS:-- |
