# Supplementary material
Source: MDPI journal article supplement (https://www.mdpi.com/2076-3417/11/6/2503)
Supplement: s1 [file s1]

## Stable Features Report | MAMMOGRAPHY

### morphology

|   | Feature Name            | Unit | Feature details                   |
|---|-------------------------|------|-----------------------------------|
| 1 | area                    | mm^2 | MORPH,--,MAM,--,LIN:--,S:--,RS:-- |
| 2 | perimeter               | mm   | MORPH,--,MAM,--,LIN:--,S:--,RS:-- |
| 3 | perimeter to area ratio | --   | MORPH,--,MAM,--,LIN:--,S:--,RS:-- |
| 6 | acircularity            | --   | MORPH,--,MAM,--,LIN:--,S:--,RS:-- |
| 7 | center of mass shift    | mm   | MORPH,--,MAM,--,LIN:--,S:--,RS:-- |
| 8 | maximum diameter        | mm   | MORPH,--,MAM,--,LIN:--,S:--,RS:-- |
| 9 | area density aabb       | --   | MORPH,--,MAM,--,LIN:--,S:--,RS:-- |

### intensity-based statistics

|    | Feature Name                   | Unit | Feature details                  |
|----|--------------------------------|------|----------------------------------|
| 11 | mean                           | --   | STAT,--,MAM,--,LIN:2,S:1mm,RS:-- |
| 12 | variance                       | --   | STAT,--,MAM,--,LIN:2,S:1mm,RS:-- |
| 15 | median                         | --   | STAT,--,MAM,--,LIN:2,S:1mm,RS:-- |
| 16 | minimum                        | --   | STAT,--,MAM,--,LIN:2,S:1mm,RS:-- |
| 17 | 10th percentile                | --   | STAT,--,MAM,--,LIN:2,S:1mm,RS:-- |
| 18 | 90th percentile                | --   | STAT,--,MAM,--,LIN:2,S:1mm,RS:-- |
| 19 | maximum                        | --   | STAT,--,MAM,--,LIN:2,S:1mm,RS:-- |
| 20 | Interquartile range            | --   | STAT,--,MAM,--,LIN:2,S:1mm,RS:-- |
| 21 | range                          | --   | STAT,--,MAM,--,LIN:2,S:1mm,RS:-- |
| 22 | Mean absolut deviation         | --   | STAT,--,MAM,--,LIN:2,S:1mm,RS:-- |
| 23 | Robust mean absolute deviation | --   | STAT,--,MAM,--,LIN:2,S:1mm,RS:-- |
| 24 | Median absolute deviation      | --   | STAT,--,MAM,--,LIN:2,S:1mm,RS:-- |
| 25 | Coefficient of variation       | --   | STAT,--,MAM,--,LIN:2,S:1mm,RS:-- |
| 26 | Quartile coefficient           | --   | STAT,--,MAM,--,LIN:2,S:1mm,RS:-- |
| 27 | Energy                         | --   | STAT,--,MAM,--,LIN:2,S:1mm,RS:-- |
| 28 | Root mean                      | --   | STAT,--,MAM,--,LIN:2,S:1mm,RS:-- |

### intensity histogram

|    | Feature Name               | Unit | Feature details                    |
|----|----------------------------|------|------------------------------------|
| 36 | maximum                    | --   | IH,--,MAM,FBN:64,LIN:2,S:1mm,RS:-- |
| 38 | range                      | --   | IH,--,MAM,FBN:64,LIN:2,S:1mm,RS:-- |
| 43 | entropy                    | --   | IH,--,MAM,FBN:64,LIN:2,S:1mm,RS:-- |
| 44 | uniformity                 | --   | IH,--,MAM,FBN:64,LIN:2,S:1mm,RS:-- |
| 45 | energy                     | --   | IH,--,MAM,FBN:64,LIN:2,S:1mm,RS:-- |
| 46 | maximum histogram gradient | --   | IH,--,MAM,FBN:64,LIN:2,S:1mm,RS:-- |
| 48 | minimum histogram gradient | --   | IH,--,MAM,FBN:64,LIN:2,S:1mm,RS:-- |

### grey-level co-occurrence matrix

|    | Feature Name                              | Unit | Feature details                           |
|----|-------------------------------------------|------|-------------------------------------------|
| 50 | joint maximum                             | --   | CM,2D:avg,MAM,FBN:64,LIN:2,S:1mm,RS:--    |
| 52 | joint variance                            | --   | CM,2D:avg,MAM,FBN:64,LIN:2,S:1mm,RS:--    |
| 53 | joint entropy                             | --   | CM,2D:avg,MAM,FBN:64,LIN:2,S:1mm,RS:--    |
| 54 | difference average                        | --   | CM,2D:avg,MAM,FBN:64,LIN:2,S:1mm,RS:--    |
| 56 | difference entropy                        | --   | CM,2D:avg,MAM,FBN:64,LIN:2,S:1mm,RS:--    |
| 59 | sum entropy                               | --   | CM,2D:avg,MAM,FBN:64,LIN:2,S:1mm,RS:--    |
| 60 | angular second moment                     | --   | CM,2D:avg,MAM,FBN:64,LIN:2,S:1mm,RS:--    |
| 61 | contrast                                  | --   | CM,2D:avg,MAM,FBN:64,LIN:2,S:1mm,RS:--    |
| 62 | dissimilarity                             | --   | CM,2D:avg,MAM,FBN:64,LIN:2,S:1mm,RS:--    |
| 64 | inverse difference normalised             | --   | CM,2D:avg,MAM,FBN:64,LIN:2,S:1mm,RS:--    |
| 66 | inverse difference moment normalised      | --   | CM,2D:avg,MAM,FBN:64,LIN:2,S:1mm,RS:--    |
| 68 | correlation                               | --   | CM,2D:avg,MAM,FBN:64,LIN:2,S:1mm,RS:--    |
| 73 | first measure of information correlation  | --   | CM,2D:avg,MAM,FBN:64,LIN:2,S:1mm,RS:--    |
| 74 | second measure of information correlation | --   | CM,2D:avg,MAM,FBN:64,LIN:2,S:1mm,RS:--    |
| 75 | joint maximum                             | --   | CM,2.5D:dmrg,MAM,FBN:64,LIN:2,S:1mm,RS:-- |

|     |                                           |    |                                           |
|-----|-------------------------------------------|----|-------------------------------------------|
| 77  | joint variance                            | -- | CM,2.5D:dmrg,MAM,FBN:64,LIN:2,S:1mm,RS:-- |
| 78  | joint entropy                             | -- | CM,2.5D:dmrg,MAM,FBN:64,LIN:2,S:1mm,RS:-- |
| 79  | difference average                        | -- | CM,2.5D:dmrg,MAM,FBN:64,LIN:2,S:1mm,RS:-- |
| 81  | difference entropy                        | -- | CM,2.5D:dmrg,MAM,FBN:64,LIN:2,S:1mm,RS:-- |
| 84  | sum entropy                               | -- | CM,2.5D:dmrg,MAM,FBN:64,LIN:2,S:1mm,RS:-- |
| 85  | angular second moment                     | -- | CM,2.5D:dmrg,MAM,FBN:64,LIN:2,S:1mm,RS:-- |
| 86  | contrast                                  | -- | CM,2.5D:dmrg,MAM,FBN:64,LIN:2,S:1mm,RS:-- |
| 87  | dissimilarity                             | -- | CM,2.5D:dmrg,MAM,FBN:64,LIN:2,S:1mm,RS:-- |
| 89  | inverse difference normalised             | -- | CM,2.5D:dmrg,MAM,FBN:64,LIN:2,S:1mm,RS:-- |
| 91  | inverse difference moment normalised      | -- | CM,2.5D:dmrg,MAM,FBN:64,LIN:2,S:1mm,RS:-- |
| 93  | correlation                               | -- | CM,2.5D:dmrg,MAM,FBN:64,LIN:2,S:1mm,RS:-- |
| 98  | first measure of information correlation  | -- | CM,2.5D:dmrg,MAM,FBN:64,LIN:2,S:1mm,RS:-- |
| 99  | second measure of information correlation | -- | CM,2.5D:dmrg,MAM,FBN:64,LIN:2,S:1mm,RS:-- |
| 102 | joint variance                            | -- | CM,2D:mrg,MAM,FBN:64,LIN:2,S:1mm,RS:--    |
| 103 | joint entropy                             | -- | CM,2D:mrg,MAM,FBN:64,LIN:2,S:1mm,RS:--    |
| 104 | difference average                        | -- | CM,2D:mrg,MAM,FBN:64,LIN:2,S:1mm,RS:--    |
| 105 | difference variance                       | -- | CM,2D:mrg,MAM,FBN:64,LIN:2,S:1mm,RS:--    |
| 109 | sum entropy                               | -- | CM,2D:mrg,MAM,FBN:64,LIN:2,S:1mm,RS:--    |
| 110 | angular second moment                     | -- | CM,2D:mrg,MAM,FBN:64,LIN:2,S:1mm,RS:--    |
| 111 | contrast                                  | -- | CM,2D:mrg,MAM,FBN:64,LIN:2,S:1mm,RS:--    |
| 112 | dissimilarity                             | -- | CM,2D:mrg,MAM,FBN:64,LIN:2,S:1mm,RS:--    |
| 114 | inverse difference normalised             | -- | CM,2D:mrg,MAM,FBN:64,LIN:2,S:1mm,RS:--    |
| 116 | inverse difference moment normalised      | -- | CM,2D:mrg,MAM,FBN:64,LIN:2,S:1mm,RS:--    |
| 118 | correlation                               | -- | CM,2D:mrg,MAM,FBN:64,LIN:2,S:1mm,RS:--    |
| 123 | first measure of information correlation  | -- | CM,2D:mrg,MAM,FBN:64,LIN:2,S:1mm,RS:--    |
| 124 | second measure of information correlation | -- | CM,2D:mrg,MAM,FBN:64,LIN:2,S:1mm,RS:--    |
| 127 | joint variance                            | -- | CM,2.5D:vmrg,MAM,FBN:64,LIN:2,S:1mm,RS:-- |
| 128 | joint entropy                             | -- | CM,2.5D:vmrg,MAM,FBN:64,LIN:2,S:1mm,RS:-- |
| 129 | difference average                        | -- | CM,2.5D:vmrg,MAM,FBN:64,LIN:2,S:1mm,RS:-- |
| 130 | difference variance                       | -- | CM,2.5D:vmrg,MAM,FBN:64,LIN:2,S:1mm,RS:-- |
| 134 | sum entropy                               | -- | CM,2.5D:vmrg,MAM,FBN:64,LIN:2,S:1mm,RS:-- |
| 135 | angular second moment                     | -- | CM,2.5D:vmrg,MAM,FBN:64,LIN:2,S:1mm,RS:-- |
| 136 | contrast                                  | -- | CM,2.5D:vmrg,MAM,FBN:64,LIN:2,S:1mm,RS:-- |
| 137 | dissimilarity                             | -- | CM,2.5D:vmrg,MAM,FBN:64,LIN:2,S:1mm,RS:-- |
| 139 | inverse difference normalised             | -- | CM,2.5D:vmrg,MAM,FBN:64,LIN:2,S:1mm,RS:-- |
| 141 | inverse difference moment normalised      | -- | CM,2.5D:vmrg,MAM,FBN:64,LIN:2,S:1mm,RS:-- |
| 143 | correlation                               | -- | CM,2.5D:vmrg,MAM,FBN:64,LIN:2,S:1mm,RS:-- |
| 148 | first measure of information correlation  | -- | CM,2.5D:vmrg,MAM,FBN:64,LIN:2,S:1mm,RS:-- |
| 149 | second measure of information correlation | -- | CM,2.5D:vmrg,MAM,FBN:64,LIN:2,S:1mm,RS:-- |

#### grey-level run length matrix

|     | Feature Name                         | Unit | Feature details                            |
|-----|--------------------------------------|------|--------------------------------------------|
| 158 | Grey level non uniformity            | --   | RLM,2D:avg,MAM,FBN:64,LIN:2,S:1mm,RS:--    |
| 159 | Grey level non uniformity normalized | --   | RLM,2D:avg,MAM,FBN:64,LIN:2,S:1mm,RS:--    |
| 160 | Run length non uniformity            | --   | RLM,2D:avg,MAM,FBN:64,LIN:2,S:1mm,RS:--    |
| 165 | Run entropy                          | --   | RLM,2D:avg,MAM,FBN:64,LIN:2,S:1mm,RS:--    |
| 174 | Grey level non uniformity            | --   | RLM,2.5D:dmrg,MAM,FBN:64,LIN:2,S:1mm,RS:-- |
| 175 | Grey level non uniformity normalized | --   | RLM,2.5D:dmrg,MAM,FBN:64,LIN:2,S:1mm,RS:-- |
| 176 | Run length non uniformity            | --   | RLM,2.5D:dmrg,MAM,FBN:64,LIN:2,S:1mm,RS:-- |
| 181 | Run entropy                          | --   | RLM,2.5D:dmrg,MAM,FBN:64,LIN:2,S:1mm,RS:-- |
| 190 | Grey level non uniformity            | --   | RLM,2.5D:vmrg,MAM,FBN:64,LIN:2,S:1mm,RS:-- |
| 191 | Grey level non uniformity normalized | --   | RLM,2.5D:vmrg,MAM,FBN:64,LIN:2,S:1mm,RS:-- |
| 192 | Run length non uniformity            | --   | RLM,2.5D:vmrg,MAM,FBN:64,LIN:2,S:1mm,RS:-- |
| 197 | Run entropy                          | --   | RLM,2.5D:vmrg,MAM,FBN:64,LIN:2,S:1mm,RS:-- |
| 206 | Grey level non uniformity            | --   | RLM,2.5D:vmrg,MAM,FBN:64,LIN:2,S:1mm,RS:-- |
| 207 | Grey level non uniformity normalized | --   | RLM,2.5D:vmrg,MAM,FBN:64,LIN:2,S:1mm,RS:-- |
| 208 | Run length non uniformity            | --   | RLM,2.5D:vmrg,MAM,FBN:64,LIN:2,S:1mm,RS:-- |
| 211 | Grey level variance                  | --   | RLM,2.5D:vmrg,MAM,FBN:64,LIN:2,S:1mm,RS:-- |
| 212 | Run length variance                  | --   | RLM,2.5D:vmrg,MAM,FBN:64,LIN:2,S:1mm,RS:-- |
| 213 | Run entropy                          | --   | RLM,2.5D:vmrg,MAM,FBN:64,LIN:2,S:1mm,RS:-- |

#### grey-level size zone matrix

|     | Feature Name                               | Unit | Feature details                     |
|-----|--------------------------------------------|------|-------------------------------------|
| 216 | low grey level zone emphasis               | --   | SZM,2D,MAM,FBN:64,LIN:2,S:1mm,RS:-- |
| 222 | grey level non uniformity glszm            | --   | SZM,2D,MAM,FBN:64,LIN:2,S:1mm,RS:-- |
| 223 | grey level non uniformity normalized glszm | --   | SZM,2D,MAM,FBN:64,LIN:2,S:1mm,RS:-- |
| 224 | zone size non uniformity                   | --   | SZM,2D,MAM,FBN:64,LIN:2,S:1mm,RS:-- |
| 229 | zone size entropy                          | --   | SZM,2D,MAM,FBN:64,LIN:2,S:1mm,RS:-- |

|     |                                            |    |                                       |
|-----|--------------------------------------------|----|---------------------------------------|
| 232 | low grey level zone emphasis               | -- | SZM,2.5D,MAM,FBN:64,LIN:2,S:1mm,RS:-- |
| 238 | grey level non uniformity glszm            | -- | SZM,2.5D,MAM,FBN:64,LIN:2,S:1mm,RS:-- |
| 239 | grey level non uniformity normalized glszm | -- | SZM,2.5D,MAM,FBN:64,LIN:2,S:1mm,RS:-- |
| 240 | zone size non uniformity                   | -- | SZM,2.5D,MAM,FBN:64,LIN:2,S:1mm,RS:-- |
| 245 | zone size entropy                          | -- | SZM,2.5D,MAM,FBN:64,LIN:2,S:1mm,RS:-- |

#### *neighbourhood grey tone difference matrix*

|     | Feature Name | Unit | Feature details                       |
|-----|--------------|------|---------------------------------------|
| 247 | contrast     | --   | TDM,2D,MAM,FBN:64,LIN:2,S:1mm,RS:--   |
| 248 | busyness     | --   | TDM,2D,MAM,FBN:64,LIN:2,S:1mm,RS:--   |
| 250 | strength     | --   | TDM,2D,MAM,FBN:64,LIN:2,S:1mm,RS:--   |
| 252 | contrast     | --   | TDM,2.5D,MAM,FBN:64,LIN:2,S:1mm,RS:-- |
| 253 | busyness     | --   | TDM,2.5D,MAM,FBN:64,LIN:2,S:1mm,RS:-- |
| 255 | strength     | --   | TDM,2.5D,MAM,FBN:64,LIN:2,S:1mm,RS:-- |

#### *grey-level distance zone matrix*

|     | Feature Name                                  | Unit | Feature details                       |
|-----|-----------------------------------------------|------|---------------------------------------|
| 256 | small distance emphasis gldzm                 | --   | DZM,2D,MAM,FBN:64,LIN:2,S:1mm,RS:--   |
| 257 | large distance emphasis gldzm                 | --   | DZM,2D,MAM,FBN:64,LIN:2,S:1mm,RS:--   |
| 258 | low grey level zone emphasis gldzm            | --   | DZM,2D,MAM,FBN:64,LIN:2,S:1mm,RS:--   |
| 262 | large distance high grey level emphasis gldzm | --   | DZM,2D,MAM,FBN:64,LIN:2,S:1mm,RS:--   |
| 263 | grey level non uniformity gldzm               | --   | DZM,2D,MAM,FBN:64,LIN:2,S:1mm,RS:--   |
| 264 | grey level non uniformity normalized gldzm    | --   | DZM,2D,MAM,FBN:64,LIN:2,S:1mm,RS:--   |
| 265 | zone distance non uniformity gldzm            | --   | DZM,2D,MAM,FBN:64,LIN:2,S:1mm,RS:--   |
| 266 | zone distance non uniformity normalized gldzm | --   | DZM,2D,MAM,FBN:64,LIN:2,S:1mm,RS:--   |
| 269 | zone distance variance gldzm                  | --   | DZM,2D,MAM,FBN:64,LIN:2,S:1mm,RS:--   |
| 270 | zone distance entropy gldzm                   | --   | DZM,2D,MAM,FBN:64,LIN:2,S:1mm,RS:--   |
| 271 | small distance emphasis gldzm                 | --   | DZM,2.5D,MAM,FBN:64,LIN:2,S:1mm,RS:-- |
| 272 | large distance emphasis gldzm                 | --   | DZM,2.5D,MAM,FBN:64,LIN:2,S:1mm,RS:-- |
| 273 | low grey level zone emphasis gldzm            | --   | DZM,2.5D,MAM,FBN:64,LIN:2,S:1mm,RS:-- |
| 277 | large distance high grey level emphasis gldzm | --   | DZM,2.5D,MAM,FBN:64,LIN:2,S:1mm,RS:-- |
| 278 | grey level non uniformity gldzm               | --   | DZM,2.5D,MAM,FBN:64,LIN:2,S:1mm,RS:-- |
| 279 | grey level non uniformity normalized gldzm    | --   | DZM,2.5D,MAM,FBN:64,LIN:2,S:1mm,RS:-- |
| 280 | zone distance non uniformity gldzm            | --   | DZM,2.5D,MAM,FBN:64,LIN:2,S:1mm,RS:-- |
| 281 | zone distance non uniformity normalized gldzm | --   | DZM,2.5D,MAM,FBN:64,LIN:2,S:1mm,RS:-- |
| 284 | zone distance variance gldzm                  | --   | DZM,2.5D,MAM,FBN:64,LIN:2,S:1mm,RS:-- |
| 285 | zone distance entropy gldzm                   | --   | DZM,2.5D,MAM,FBN:64,LIN:2,S:1mm,RS:-- |

#### *neighbouring grey level dependence matrix*

|     | Feature Name                         | Unit | Feature details                       |
|-----|--------------------------------------|------|---------------------------------------|
| 294 | grey level non uniformity            | --   | LDM,2D,MAM,FBN:64,LIN:2,S:1mm,RS:--   |
| 295 | grey level non uniformity normalized | --   | LDM,2D,MAM,FBN:64,LIN:2,S:1mm,RS:--   |
| 296 | dependence count non uniformity      | --   | LDM,2D,MAM,FBN:64,LIN:2,S:1mm,RS:--   |
| 298 | dependence count percentage          | --   | LDM,2D,MAM,FBN:64,LIN:2,S:1mm,RS:--   |
| 301 | dependence count entropy             | --   | LDM,2D,MAM,FBN:64,LIN:2,S:1mm,RS:--   |
| 302 | dependence count energy              | --   | LDM,2D,MAM,FBN:64,LIN:2,S:1mm,RS:--   |
| 311 | grey level non uniformity            | --   | LDM,2.5D,MAM,FBN:64,LIN:2,S:1mm,RS:-- |
| 312 | grey level non uniformity normalized | --   | LDM,2.5D,MAM,FBN:64,LIN:2,S:1mm,RS:-- |
| 313 | dependence count non uniformity      | --   | LDM,2.5D,MAM,FBN:64,LIN:2,S:1mm,RS:-- |
| 315 | dependence count percentage          | --   | LDM,2.5D,MAM,FBN:64,LIN:2,S:1mm,RS:-- |
| 318 | dependence count entropy             | --   | LDM,2.5D,MAM,FBN:64,LIN:2,S:1mm,RS:-- |
| 319 | dependence count energy              | --   | LDM,2.5D,MAM,FBN:64,LIN:2,S:1mm,RS:-- |
